# Supplementary material for: Sustainable Inventory with Robust Periodic-Affine Policies and Application to Medical Supply Chains
Source: Atypon-hosted journal article supplement (doi:10.1287/mnsc.2018.3152), 2019-05-23
Supplement: mnsc.2018.3152.sm1.pdf [file mnsc.2018.3152.sm1.pdf]

## Appendix. Appendix

Proofs of Auxiliary Results.

### A. Proof of Proposition 1.

First suppose that the nominal mean  $\boldsymbol{\mu}$  increases by  $\boldsymbol{\Delta\mu} \geq \mathbf{0}$ . Then there exists  $\boldsymbol{\Delta\mathbf{s}^*} \geq \mathbf{0}$  and  $\boldsymbol{\Delta\mathbf{x}^*} \geq \mathbf{0}$  that solves the nominal problem with deterministic demand  $\boldsymbol{\Delta\mu}$ , with non-negative profit  $P \geq 0$ . Thus the worst-case profit with  $\boldsymbol{\mu} + \boldsymbol{\Delta\mu}$  increases at least by  $P$ . On the other hand, one can show that the set  $\mathcal{U}$  increases in any of  $\lambda_1, \dots, \lambda_l$ , followed by that the objective value decreases.  $\square$

### B. Proof of Proposition 2.

For fixed  $\{\mathbf{w}_t, \mathbf{W}_{\tau,t}\}$  and  $\mathbf{D}_{[1:T]}$ , the inner maximization in problem (6) with respect to  $\mathbf{X}_{[1:T]}$  is a linear program in which  $\{\mathbf{w}_t, \mathbf{W}_{\tau,t}\}$  are on the right-hand side. It follows that for any  $\mathbf{D}_{[1:T]}$ , the inner maximization problem (6) is concave in  $\{\mathbf{w}_t, \mathbf{W}_{\tau,t}\}$ . Hence the objective function in (6) is concave as well, because it is a pointwise infimum of concave functions. Moreover, the problem is always feasible with assigning zero vectors and matrices to  $\{\mathbf{w}_t, \mathbf{W}_{\tau,t}\}$ . Finally, applying strong duality to constraint (7) shows that a feasible set of  $\{\mathbf{w}_t, \mathbf{W}_{\tau,t}\}$  is a polyhedron and hence, convex.  $\square$

### C. Proof of Proposition 3.

$\Phi(s_0, d_0) := \max_{\pi} V(\pi(w_t, W_{\tau,t}); s_0, d_0)$ , where  $V(\pi(w_t, W_{\tau,t}); s_0, d_0)$  is defined as

$$\begin{aligned} V(\pi(w_t, W_{\tau,t}); s_0, d_0) &:= \min_{\mathbf{d} \in \mathcal{U}^T} \max_{\mathbf{x}, \mathbf{s}} P(\pi(w_t, W_{\tau,t}), \mathbf{d}, \mathbf{x}; s_0, d_0) \\ &= \min_{\mathbf{d} \in \mathcal{U}^T} \max_{\mathbf{x}, \mathbf{s}} \left[ -c_S \left( \sum_{t=1}^T s_t \right) - c_H \sum_{t=1}^T \left( s_0 + \sum_{\tau=1}^t (s_{\tau} - x_{\tau}) \right) \right. \\ &\quad \left. - c_P \sum_{t=1}^T \left( d_0 + \sum_{\tau=1}^t (d_{\tau} - x_{\tau}) \right) + r \left( \sum_{t=1}^T x_t \right) \right], \end{aligned}$$

where the inner maximization problem has a feasible set  $\mathcal{X}(\pi, \mathbf{d}, s_0, d_0)$ .

We first claim that the following equation holds for any affine policy  $\pi(w_t, W_{\tau,t})$  such that  $s_0 \leq w_1$ ,

$$V(\bar{\pi}(\bar{w}_t, \bar{W}_{\tau,t}); s_0, d_0) = V(\pi(w_t, W_{\tau,t}); 0, 0) + c_S s_0 + (r - c_S) d_0, \quad (24)$$

where  $\bar{\pi}(\bar{w}_t, \bar{W}_{\tau,t})$  is defined as (11). For any demand realization  $\mathbf{d} \in \mathcal{U}^T$ , let  $\tilde{s}_t = \tilde{s}_t(\pi, \mathbf{d})$  and  $\tilde{x}_t = \tilde{x}_t(\pi, \mathbf{d})$  be an aggregated order quantity and the corresponding optimal processing activity at time  $t$  with zero initial input and demand, i.e., it solves the inner maximization problem of  $V(\pi; 0, 0)$  with  $\mathbf{d}$ . Let  $\tilde{\tilde{s}}_t = \tilde{\tilde{s}}_t(\bar{\pi}, \mathbf{d})$  be an order quantity by the policy  $\bar{\pi}$  for  $V(\bar{\pi}; s_0, d_0)$ , and define  $\tilde{\tilde{x}}_t = \tilde{\tilde{x}}_t(\mathbf{d}) = \tilde{x}_t(\mathbf{d}) + d_0$ . Then by (11),  $\tilde{\tilde{s}}_t = \tilde{s}_t - s_0 + d_0$  for every  $t = 1, \dots, T$ , and thus

$$\begin{aligned} &P(\pi(w_t, W_{\tau,t}), \mathbf{d}, \mathbf{x}; 0, 0) + c_S s_0 + (r - c_S) d_0 \\ &= \left( -c_S \tilde{s}_T - c_H \sum_{t=1}^T (\tilde{s}_t - \tilde{x}_t) - c_P \sum_{t=1}^T (\tilde{d}_t - \tilde{x}_t) + r \tilde{x}_T \right) + (r - c_S) d_0 + c_S s_0 \\ &= -c_S (\tilde{s}_T - s_0 + d_0) - c_H \sum_{t=1}^T (\tilde{s}_t + d_0) - c_P \sum_{t=1}^T (d_0 + \tilde{d}_t) + (c_H + c_P) \sum_{t=1}^T (\tilde{x}_t + d_0) + r (\tilde{x}_T + d_0) \\ &= -c_S \tilde{\tilde{s}}_T - c_H \sum_{t=1}^T (s_0 + \tilde{s}_t - \tilde{x}_t) - c_P \sum_{t=1}^T (d_0 + \tilde{d}_t - \tilde{x}_t) + r \tilde{\tilde{x}}_T \\ &= P(\bar{\pi}(\bar{w}_t, \bar{W}_{\tau,t}), \mathbf{d}, \bar{\mathbf{x}}; s_0, d_0). \end{aligned}$$

Since  $\bar{\mathbf{x}}$  is a feasible solution of the inner maximization problem in  $V(\bar{\pi}; s_0, d_0)$ , the LHS of (24) is greater than or equal to the RHS. Similar argument can be made to show the contrary and this concludes the proof of (24).

Now suppose  $\bar{\pi}^*(\bar{w}_t^*, \bar{W}_{\tau,t}^*)$  is not optimal, and let  $\bar{\varphi}^*(\bar{v}_t^*, \bar{V}_{\tau,t}^*)$  be an optimal solution of  $\Phi(s_0, d_0)$ . Now one can easily check that by (24),

$$\begin{aligned}\Phi(s_0, d_0) &= V(\bar{\varphi}^*; s_0, d_0) = V(\varphi^*; 0, 0) + c_S s_0 + (r - c_S) d_0 \\ &\leq V(\pi^*; 0, 0) + c_S s_0 + (r - c_S) d_0 = V(\bar{\pi}^*; s_0, d_0) < \Phi(s_0, d_0),\end{aligned}$$

which makes a contradiction. Finally, the proof of Eq. (24) directly shows that both  $\Phi(0, 0)$  and  $\Phi(s_0, d_0)$  shares a common worst-case scenario among  $\mathcal{U}^T$ .  $\square$

#### D. Proof of Proposition 4.

Let  $\bar{\pi}_{\text{PA}} = (\bar{\pi}_1, \dots, \bar{\pi}_N)$ , where each  $\bar{\pi}_j$  solves the  $j^{\text{th}}$  subproblem. Then the worst-case scenario  $(\mathbf{d}_1^*, \dots, \mathbf{d}_N^*)$  solves an optimization problem

$$\min_{\mathbf{d}_1, \dots, \mathbf{d}_N} \max_{\mathbf{x}_1, \dots, \mathbf{x}_N} \left[ \sum_{j=1}^N P_j(\bar{\pi}_j, \mathbf{d}_j, \mathbf{x}_j; u_{t_{j-1}}^s, u_{t_{j-1}}^d) \right]. \quad (25)$$

Since  $\bar{\pi}_{\text{PA}}$  is a well-defined periodic-affine policy, (25) is rewritten as

$$\begin{aligned}& \min_{\mathbf{d}_1, \dots, \mathbf{d}_N} \max_{\mathbf{x}_1, \dots, \mathbf{x}_N} \left[ \sum_{j=1}^N P_j(\bar{\pi}_j, \mathbf{d}_j, \mathbf{x}_j; u_{t_{j-1}}^s, u_{t_{j-1}}^d) \right] \\ &= \min_{\mathbf{d}_1, \dots, \mathbf{d}_N} \max_{\mathbf{x}_1, \dots, \mathbf{x}_N} \left[ \sum_{j=1}^N \tilde{P}_j(\bar{\pi}_j, \mathbf{d}_j, \mathbf{x}_j; u_{t_{j-1}}^s, u_{t_{j-1}}^d) \right] \\ &= \min_{\mathbf{d}_1, \dots, \mathbf{d}_N} \max_{\mathbf{x}_1, \dots, \mathbf{x}_N} \left[ \sum_{j=1}^N P_j^{\text{PA}}(\bar{\pi}_j, \mathbf{d}_j, \mathbf{x}_j) \right] \\ &= \sum_{j=1}^N \left[ \min_{\mathbf{d}_j \in \mathcal{U}^j} \max_{\mathbf{x}_j} P_j^{\text{PA}}(\bar{\pi}_j, \mathbf{d}_j, \mathbf{x}_j) \right] \\ &= \sum_{j=1}^N \max_{\mathbf{x}_j} P_j^{\text{PA}}(\bar{\pi}_j, \mathbf{d}_j^*, \mathbf{x}_j),\end{aligned}$$

where  $\tilde{P}_j$  and  $P_j^{\text{PA}}$  are defined in (18) and (19). As a result, the overall objective function is separable for each subproblem, and hence, the worst-case scenario consists of those of the subperiods.  $\square$

#### E. Proof of Theorem 1.

Since every affine policy is feasible to the DP problem (12), proving  $V_{\text{Aff}}^* \leq V_{\text{DP}}^*$  directly follows. Thus it suffices to show  $V_{\text{PA}}^* = V_{\text{DP}}^*$ , and let  $\bar{\pi}_{\text{PA}} = (\bar{\pi}_1, \dots, \bar{\pi}_N)$  be an output of the periodic-affine algorithm. That is,  $\bar{\pi}_j$  is an affine-IBS policy associated with  $\pi_j = \pi_j(w_t^{(j)}, W_{\tau,t}^{(j)})$ , where  $\pi_j$  solves (20) for each  $j = 1, \dots, N$ . Define  $V_j(u^s, u^d)$  as a worst-case optimal profit from the  $j^{\text{th}}$  subperiod to the last period, where  $u^s$  and  $u^d$  are current on-hand input and backlogged demand. Our framework justifies using the (robust) optimality equation and a (worst-case) value function approach in robust dynamic programming scheme; we refer Iyengar (2005) to readers for technical details. We will show for every  $j = 1, \dots, N$ ,

- (a)  $V_j(u^s, u^d)$  is concave in  $(u^s, u^d)$ , and

(b)  $V_j(u^s, u^d) = V_j(0, 0) + c_S u^s + (r - c_S)u^d$  for every  $0 \leq u^s \leq w_1^{(j)}$ ,  $u^d \geq 0$ .

by mathematical induction.

Now consider  $j = N$  and suppose  $u^s \leq w_1^{(N)}$ . Then  $V_N(u^s, u^d)$  can be written as

$$V_N(u^s, u^d) := \max_{\pi \in \Pi_{\text{aff}}(\mathcal{U}^N)} \min_{\mathbf{d}_N} \max_{\mathbf{x}_N, \mathbf{s}_N} P_N(\pi, \mathbf{d}_N, \mathbf{x}_N; u^s, u^d)$$

$$\text{s.t. } (\mathbf{x}_N, \mathbf{s}_N) \in \mathcal{X}(\pi, \mathbf{d}_N, u^s, u^d),$$

where  $\pi = \pi(w_t, W_{\tau,t})$  and the constraints in  $\mathcal{X}(\pi, \mathbf{d}_N, u^s, u^d)$  can be rearranged so that the right hand sides are linear in  $(u^s, u^d, w_t, W_{\tau,t})$ . Since  $P_N$  is concave in  $(\mathbf{x}_N, w_t, W_{\tau,t}, u^s, u^d)$  and  $\mathcal{X}(\pi, \mathbf{d}_N, u^s, u^d)$  defines a polyhedron for any  $\pi$ ,  $u^s$ , and  $u^d$ , the objective function within the min operator is concave in  $(u^s, u^d, w_t, W_{\tau,t})$  by concavity preservation under maximization. Since a pointwise infimum of concave functions are concave and applying concavity preservation under maximization again to the outermost max operator, we finally have that  $V_N(u^s, u^d)$  is concave in  $(u^s, u^d)$ . On the other hand, (b) follows directly from Proposition 3 for  $j = N$ .

Now suppose that both (a) and (b) hold for any  $1 < j \leq N$ , and let  $u^s \leq w_1^{(j-1)}$  and  $u^d \geq 0$ . Then from the optimality equation, we have

$$V_{j-1}(u^s, u^d) = \max_{\pi \in \Pi_{\text{aff}}(\mathcal{U}^{j-1})} \min_{\mathbf{d}_{j-1}} \max_{\mathbf{x}_{j-1}} \left[ P_{j-1}(\pi, \mathbf{d}_{j-1}, \mathbf{x}_{j-1}; u^s, u^d) + V_j(u_j^s, u_j^d) \right]. \quad (26)$$

Since  $V_j(u_j^s, u_j^d)$  is concave in  $(u_j^s, u_j^d)$  and  $(u_j^s, u_j^d)$  can be expressed as affine functions of  $(w_t, W_{\tau,t}, u^s, u^d)$ , applying the above argument shows that  $V_{j-1}(u^s, u^d)$  is also concave in  $(u^s, u^d)$ . In addition, we have

$$\begin{aligned} V_{j-1}(u^s, u^d) &= \max_{\pi \in \Pi_{\text{aff}}(\mathcal{U}^{j-1})} \min_{\mathbf{d}_{j-1}} \max_{\mathbf{x}_{j-1}} \left[ P_{j-1}(\pi, \mathbf{d}_{j-1}, \mathbf{x}_{j-1}; u^s, u^d) + V_j(u_j^s, u_j^d) \right] \\ &\leq \max_{\pi \in \Pi_{\text{aff}}(\mathcal{U}^{j-1})} \min_{\mathbf{d}_{j-1}} \max_{\mathbf{x}_{j-1}} \left[ P_{j-1}(\pi, \mathbf{d}_{j-1}, \mathbf{x}_{j-1}; u^s, u^d) + V_j(0, 0) + c_S u_j^s + (r - c_S)u_j^d \right] \\ &= \max_{\pi \in \Pi_{\text{aff}}(\mathcal{U}^{j-1})} \min_{\mathbf{d}_{j-1}} \max_{\mathbf{x}_{j-1}} \left[ P_{j-1}(\pi, \mathbf{d}_{j-1}, \mathbf{x}_{j-1}; u^s, u^d) + c_S u_j^s + (r - c_S)u_j^d \right] + V_j(0, 0) \\ &= \max_{\pi \in \Pi_{\text{aff}}(\mathcal{U}^{j-1})} \min_{\mathbf{d}_{j-1}} \max_{\mathbf{x}_{j-1}} \left[ \tilde{P}_{j-1}(\pi, \mathbf{d}_{j-1}, \mathbf{x}_{j-1}; u^s, u^d) + c_S u^s + (r - c_S)u^d \right] + V_j(0, 0) \\ &= c_S u^s + (r - c_S)u^d + \max_{\pi \in \Pi_{\text{aff}}(\mathcal{U}^{j-1})} \min_{\mathbf{d}_{j-1}} \max_{\mathbf{x}_{j-1}} \left[ \tilde{P}_{j-1}(\pi, \mathbf{d}_{j-1}, \mathbf{x}_{j-1}; 0, 0) \right] + V_j(0, 0) \\ &\leq V_{j-1}(u^s, u^d). \end{aligned}$$

The first inequality comes from that both (a) and (b) hold for  $V_j$ , and the third equality is from the definition of  $\tilde{P}_{j-1}$ . Finally, the last inequality is a worst-case profit from  $j^{\text{th}}$  subperiod with a policy  $\bar{\pi}_{\text{PA}}$ , by Assumption 1. Since  $\bar{\pi}_{\text{PA}}$  is a feasible policy to the DP, the last inequality follows. This shows that whenever  $u^s \leq w_1^{(j-1)}$ , then the value function  $V_{j-1}(u^s, u^d)$  is achieved with a policy  $(\bar{\pi}_{j-1}, \dots, \bar{\pi}_N)$ . Finally we have

$$\begin{aligned} V_{j-1}(u^s, u^d) &= c_S u^s + (r - c_S)u^d + \max_{\pi \in \Pi_{\text{aff}}(\mathcal{U}^{j-1})} \min_{\mathbf{d}_{j-1}} \max_{\mathbf{x}_{j-1}} \left[ \tilde{P}_{j-1}(\pi, \mathbf{d}_{j-1}, \mathbf{x}_{j-1}; 0, 0) \right] + V_j(0, 0) \\ &= V_{j-1}(0, 0) + c_S u^s + (r - c_S)u^d, \end{aligned}$$

and thus (b) holds for  $j - 1$ . By Assumption 1,  $\bar{\pi}_{\text{PA}} = (\bar{\pi}_1, \dots, \bar{\pi}_N)$  satisfies  $u_{t_j}^s \leq w_1^{(j+1)}$  for every  $j = 1, \dots, N - 1$  and every realization of demands, and hence,  $\bar{\pi}_{\text{PA}}$  is Bellman-optimal to the DP (12) and this concludes with  $V_{\text{PA}}^* = V_{\text{DP}}^*$ .  $\square$

## F. Proof of Proposition 5.

It suffices to show that an optimal periodic-affine policy is indeed an affine policy. Using the same notations in Theorem 1 and without loss of generality, we may assume that  $N = 2$  and let  $\bar{\pi}_{\text{PA}}^* = (\bar{\pi}_1, \bar{\pi}_2)$ , where  $\pi_j = (w_t^{(j)}, W_{\tau,t}^{(j)})$  for  $j = 1, 2$ . By definition of periodic-affine policies, we only need to check that if an order quantity at time  $t_1 + 1$  is affine in  $\mathcal{U} = \mathcal{U}^1 \times \mathcal{U}^2$ . Recall that  $\bar{\pi}_{\text{PA}}^*$  determines order quantity at  $t_1 + 1$  as

$$\begin{aligned} w_1^{(2)} - u_{t_1}^s + u_{t_1}^d &= w_1^{(2)} - \max \left( \sum_{t=1}^{t_1} (s_t - d_t), 0 \right) + \max \left( \sum_{t=1}^{t_1} (d_t - s_t), 0 \right) \\ &= w_1^{(2)} + \left( \sum_{t=1}^{t_1} (d_t - s_t) \right). \end{aligned}$$

It is affine in  $\mathbf{d}_1$ , since  $s_t$  is affine in  $\mathbf{d}_1$ , and this concludes the proof.  $\square$

## G. Proof of Theorem 2.

We use the value function  $V_j(u^s, u^d)$  defined in Theorem 1. From concavity  $V_j(u^s, u^d)$  and using (b), we have

$$V_j(u^s, u^d) \leq V_j(0, 0) + c_S u^s + (r - c_S) u^d$$

for every  $u^s \geq 0$  and  $u^d \geq 0$ . We will show that

$$V_j(u^s, u^d) \leq c_S u^s + (r - c_S) u^d + \sum_{k=j}^N \tilde{f}_k^* \quad \forall j = 1, \dots, N \quad (27)$$

by induction, and plugging  $j = 1$  and  $u^s = u^d = 0$  into (27) concludes the proof.

From  $V_N(0, 0) = \tilde{f}_N^*$ , we have that (27) holds for  $j = N$ . Now suppose  $1 < j \leq N$ . Then from the optimality equation we have

$$\begin{aligned} V_{j-1}(u^s, u^d) &= \max_{\pi \in \Pi_{\text{aff}}(\mathcal{U}^{j-1})} \min_{\mathbf{d}_{j-1}} \max_{\mathbf{x}_{j-1}} \left[ P_{j-1}(\pi, \mathbf{d}_{j-1}, \mathbf{x}_{j-1}; u^s, u^d) + V_j(u_j^s, u_j^d) \right] \\ &\leq \max_{\pi \in \Pi_{\text{aff}}(\mathcal{U}^{j-1})} \min_{\mathbf{d}_{j-1}} \max_{\mathbf{x}_{j-1}} \left[ P_{j-1}(\pi, \mathbf{d}_{j-1}, \mathbf{x}_{j-1}; u^s, u^d) + c_S u_j^s + (r - c_S) u_j^d + \sum_{k=j}^N \tilde{f}_k^* \right] \\ &\leq c_S u^s + (r - c_S) u^d + \max_{\pi \in \Pi_{\text{aff}}(\mathcal{U}^{j-1})} \min_{\mathbf{d}_{j-1}} \max_{\mathbf{x}_{j-1}} \left[ \tilde{P}_{j-1}(\pi, \mathbf{d}_{j-1}, \mathbf{x}_{j-1}; 0, 0) \right] + \sum_{k=j}^N \tilde{f}_k^* \\ &= c_S u^s + (r - c_S) u^d + \sum_{k=j-1}^N \tilde{f}_k^*, \end{aligned}$$

where the first inequality holds from the induction hypothesis and the third equality is from definition of  $\tilde{P}_{j-1}$ . One can show that the maximization problem in the third equality is concave in  $u^s$  and  $u^d$ , as similar in the proof of Theorem 1 and this concludes the proof.  $\square$

## H. Proof of Theorem 3.

All the proofs of Theorem 1 and 2 can be extended into multi-station networks, by using a basis matrix  $\mathbf{R}_B$  to replace  $c_S u^s$  and  $(r - c_S) u^d$  terms in the proof with  $\mathbf{c}_S^\top \mathbf{u}^s$  and  $(\mathbf{R}_B^\top \mathbf{r} - \mathbf{R}_B^\top \mathbf{R}_S^\top \mathbf{c}_S)^\top \mathbf{u}^d$ , respectively. This expressions are still linear in  $\mathbf{u}^s$  and  $\mathbf{u}^d$ , hence all the arguments in the proof are valid.  $\square$

## I. Proof of Theorem 4.

It suffices to show for single-station cases, since it is straightforward to extend the result to general multi-station networks, as in Theorem 3. Note that the optimality equation for the infinite horizon problem is written as

$$V_\infty(u^s, u^d) = \max_{\pi \in \Pi_{\text{aff}}(\mathcal{U}^{T_0})} \min_{D_{[1:T_0]}} \max_{X_{[1:T_0]}} \left[ P\left(\pi, D_{[1:T_0]}, X_{[1:T_0]}; u^s, u^d\right) + \beta^{T_0} V_\infty(\bar{u}^s, \bar{u}^d) \right], \quad (28)$$

where  $\bar{u}^s$  and  $\bar{u}^d$  denotes on-hand input and backorders after  $T_0$  periods (one stage).

We impose mild conditions so that the optimality equation (28) defines a contraction mapping and there exists  $V_\infty$  which is the unique fixed point. (See Iyengar (2005) for details.) Hence the value iteration algorithm is well-defined, and let  $V_n(u^s, u^d)$  be a value function after  $n$  iterations. Recalling that  $\bar{u}^s$  and  $\bar{u}^d$  are expressed as linear functions of  $u^s$  and  $u^d$ , one can show by applying concavity preservation under maximization as similar in Theorem 1 that if  $V_n(u^s, u^d)$  is concave, then so  $V_{n+1}(u^s, u^d)$  is. Since we can start with any bounded continuous function for the value iteration algorithm, we conclude that  $V_\infty(u^s, u^d)$  is concave in  $(u^s, u^d)$ .

In this setting, there exists a stationary optimal policy  $\pi_\infty = (\pi, \pi, \dots)$  where  $\pi = \pi(u^s, u^d)$  is defined for each subperiod of length  $T_0$ . By Proposition 3, we can see that  $V_\infty(u^s, u^d) = V_\infty(0, 0) + c_S u^s + (r - c_S) u^d$  for  $u^s \leq w_1$  and with concavity of  $V_\infty$ , we have

$$V_\infty(u^s, u^d) \leq V_\infty(0, 0) + c_S u^s + (r - c_S) u^d$$

for every  $u^s \geq 0$  and  $u^d \geq 0$ .

Let  $V_\infty(\pi_\infty)$  be a worst-case objective value under policy  $\pi_\infty$ , and  $V_\infty^*$  be an optimal value of the DP problem. Since  $\pi_\infty$  is feasible to the DP by Assumption 1, we have  $V_\infty(\pi_\infty) \leq V_\infty^*$ . On the other hand,

$$\begin{aligned} V_\infty^* &= \max_{\pi \in \Pi_{\text{aff}}(\mathcal{U}^{T_0})} \min_{D_{[1:T_0]}} \max_{X_{[1:T_0]}} \left[ P\left(\pi, D_{[1:T_0]}, X_{[1:T_0]}; 0, 0\right) + \beta^{T_0} V_\infty(\bar{u}^s, \bar{u}^d) \right] \\ &\leq \max_{\pi \in \Pi_{\text{aff}}(\mathcal{U}^{T_0})} \min_{D_{[1:T_0]}} \max_{X_{[1:T_0]}} \left[ P\left(\pi, D_{[1:T_0]}, X_{[1:T_0]}; u^s, u^d\right) + \beta^{T_0} (c_S \bar{u}^s + (r - c_S) \bar{u}^d + V_\infty(0, 0)) \right] \\ &= \max_{\pi \in \Pi_{\text{aff}}(\mathcal{U}^{T_0})} \min_{D_{[1:T_0]}} \max_{X_{[1:T_0]}} P_\infty^{\text{PA}}\left(\pi, D_{[1:T_0]}, X_{[1:T_0]}\right) + \beta^{T_0} V_\infty(0, 0) \\ &= V_\infty(\pi_\infty), \end{aligned}$$

by Assumption 1 (this step is similar to Theorem 1), and this implies that an optimal value to the DP is achieved by  $\pi_\infty$ , where the stationary policy  $\pi$  is obtained by solving the optimization problem (22).  $\square$
